# Supplementary material for: Gene Amplification of EPSPS with a Mutation in Conserved Region: The Evolved Glyphosate Resistance Mechanism in Eleusine indica
Source: MDPI journal article supplement (doi:10.3390/agronomy13030699), 2023-02-27
Supplement: s1 [file s1]

**Table S1.** The designed primers for *EPSPS* gene clone, qPCR and the reference genes for *E. indica*.

| Gene                          | Foward primer (5'-3')       | Reverse primer (5'-3)   |
|-------------------------------|-----------------------------|-------------------------|
| <i>EPSPS</i> gene clone       | TCGGACTCTCTGTGGAAGCG        | CTCTCCCGCATTCTTGGCAC    |
| Expression of <i>EPSPS</i>    | GCAATTTCCCCAGTGACGACC       | GCAAAAGCCTCTATCTTCCCTGT |
| Copy number of <i>EPSPS</i>   | CTGATGGCTGCTCCTTTAGCTC      | CCCAGCTATCAGAATGCTCTGC  |
| Reference gene ( <i>ALS</i> ) | GGTGGCAAGGTTAAGTTATCTG<br>G | TCAACATAAGGGATGGAGATCAG |
