# Supplementary material for: Gene Amplification of EPSPS with a Mutation in Conserved Region: The Evolved Glyphosate Resistance Mechanism in Eleusine indica
Source: MDPI journal article supplement (doi:10.3390/agronomy13030699), 2023-02-27
Supplement: s1 [file s1]

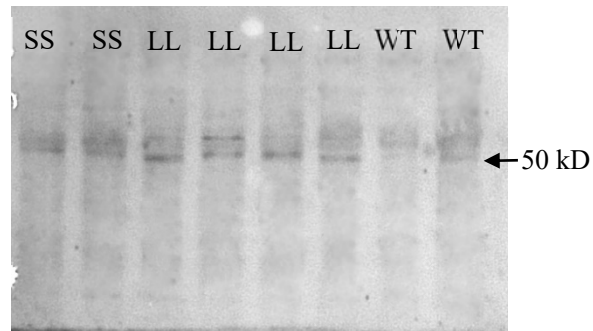

**Figure S1.** Immunoblot analysis of EPSPS protein in leaf tissue of plants from the three goosegrass populations. The primary anti-EPSPS antibody at a dilution of 1:5000. The molecular weight of EPSPS protein in goosegrass was 50 kD.
